# Supplementary material for: Guanylate binding protein-1 mediates EGFRvIII and promotes glioblastoma growth in vivo but not in vitro
Source: PubMed Central journal article supplement (PMC4891076; doi:10.18632/oncotarget.7109), 2016-02-01
Supplement: oncotarget-07-09680-s001.pdf [file oncotarget-07-09680-s001.pdf]

**SUPPLEMENTARY FIGURES**

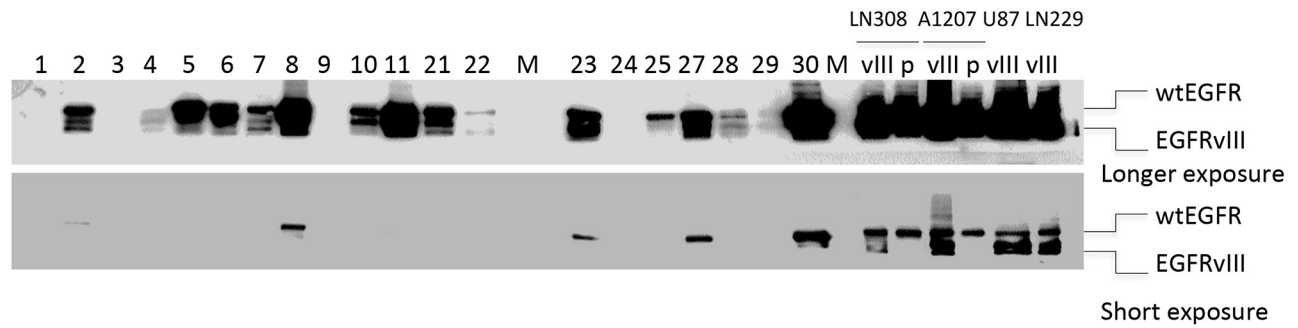

**Supplementary Figure S1: Expression status of EGFRvIII in a collection of human GBM clinical samples.** Western blot analysis of EGFRvIII was performed in 20 human GBM specimens. LN308-parental (P), LN308-EGFRvIII(vIII), A1207-P, A1207-vIII, U87-vIII, LN229-vIII are shown as positive controls for EGFRvIII expression. M=the protein marker lane.

**A**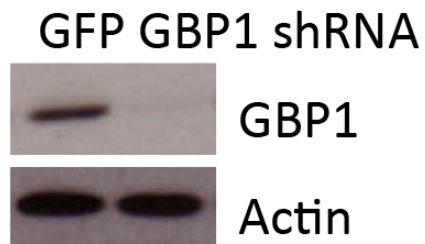**B**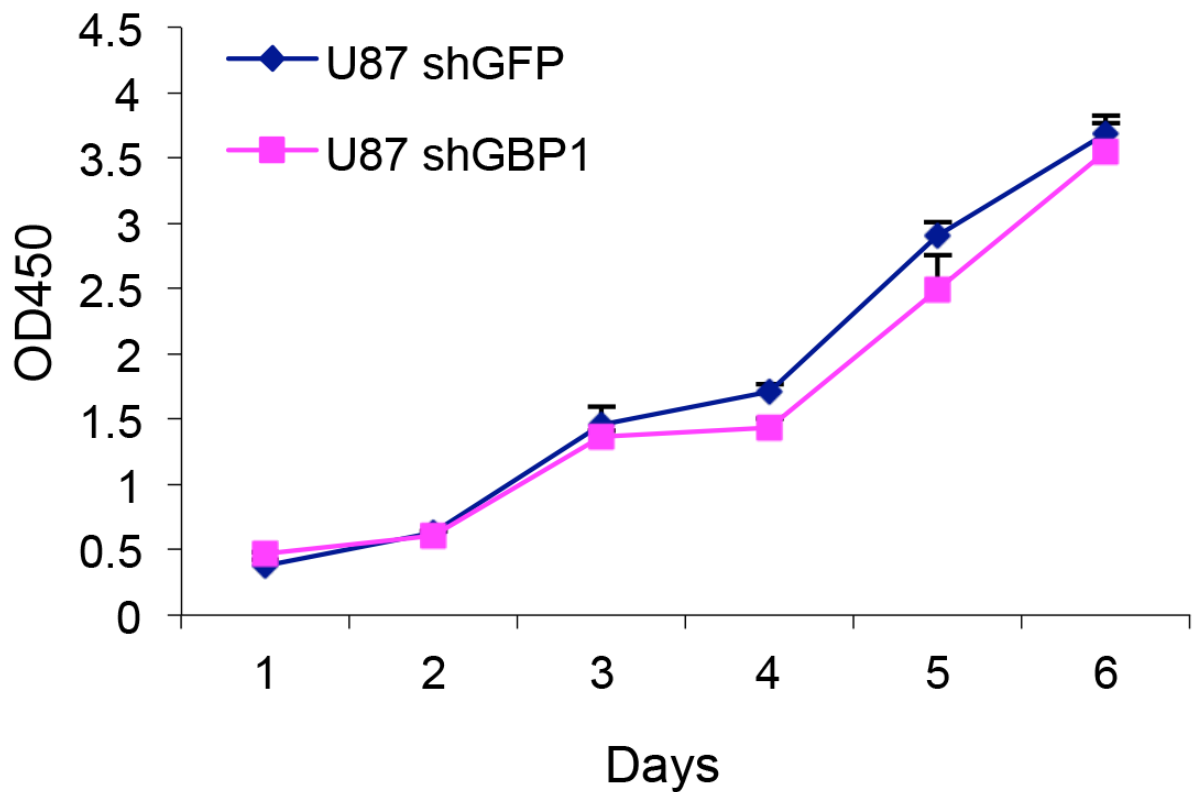

**Supplementary Figure S2: Loss of GBP1 expression has no effect on U87 parental cell proliferation.** A. Western blot analysis of GBP1 in lentiviral shRNA-GFP and -GBP1 transduced U87 parental cells. B. WST-1 assay was performed to examine the effect of GBP1 silencing on U87 parental cell proliferation.

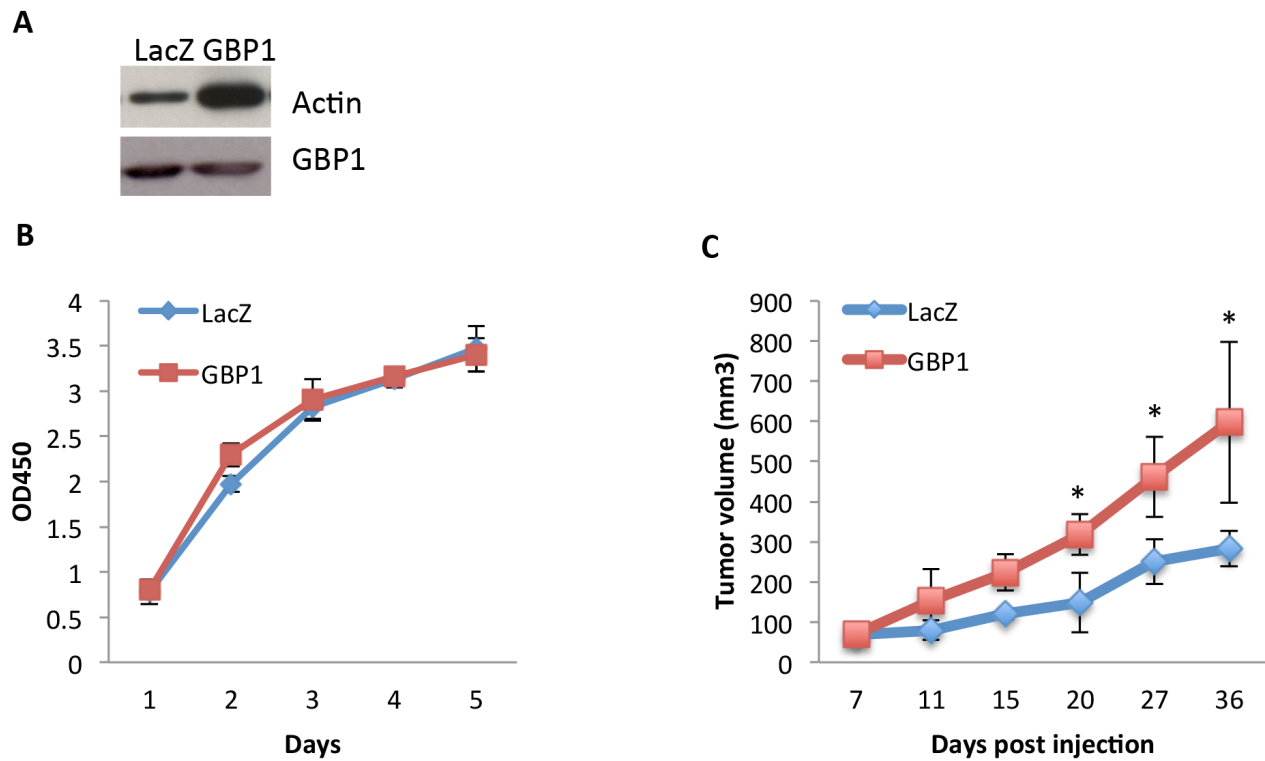

**Supplementary Figure S3: Forced expression of GBP1 increases A1207 cell growth *in vivo* but not *in vitro*.** A. Western blot analysis of GBP1 in retroviral LacZ- and -GBP1 transduced A1207 cells. B. WST-1 assay was performed to examine the effect of GBP1 expression on A1207 cell proliferation *in vitro*. C. A1207-lacZ and A1207-GBP1 flank xenograft tumor volume (mm<sup>3</sup>) was measured at the indicated time in nude mice.  $5 \times 10^6$  cells/mouse. 6 mice/group. \*,  $P < 0.05$ .
